# Supplementary material
Source: PubMed Central journal article supplement (PMC4059334)
Supplement: supp_deu083_deu083_supp_fig1.pdf [file supp_deu083_deu083_supp_fig1.pdf]

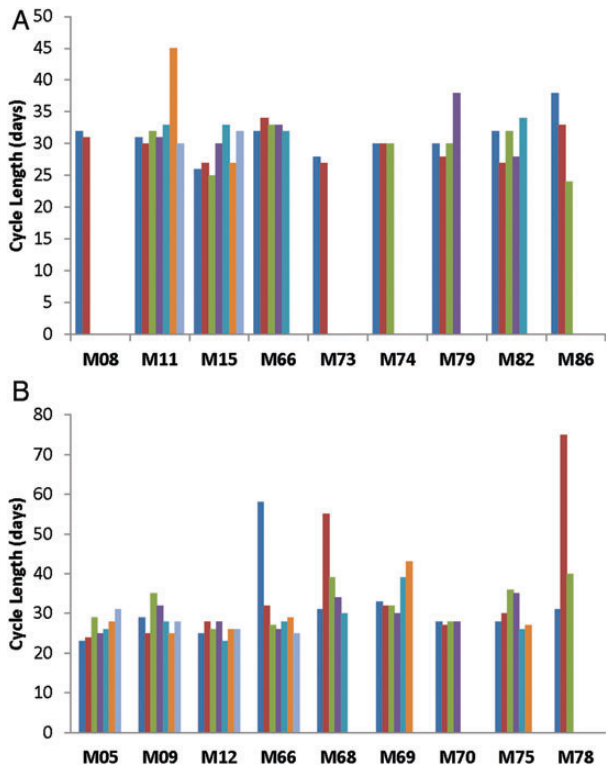

**Supplementary Figure 1** Cycle length of individual monkeys in the control and BAY06 treatment groups during the contraceptive trial (**A** and **B**, respectively). Different bar colors represent different monthly values. The labels on the 'x'-axis depict individual animals. Panel **A** shows cycle length of nine monkeys, since one of the females did not exhibit menses although hormone patterns were normal and become pregnant.
