# Supplementary material
Source: PubMed Central journal article supplement (PMC4059334)
Supplement: supp_deu083_deu083_supp_table1.pdf [file supp_deu083_deu083_supp_table1.pdf]

**Supplementary Table I** Q-PCR forward and reverse primer, and MGB probe sequences.

| Gene symbol | Forward primer (5'–3')    | Reverse primer (5'–3')   | Probe (5'–3') 6FAM-sequence-MGBNFQ |
|-------------|---------------------------|--------------------------|------------------------------------|
| PTGS2       | GAATGTTCCACCCGCAGTACA     | GCGTTTGCGGTACTCATTAAAA   | AAAGTATCACAGGCTTCCA                |
| PTGES       | GACTGACGGGAACCATTTCAAG    | AGAGGGAGTGGTGTGGTAATGC   | AAAATCCTTCAGCTAAAGTAACA            |
| PTGER2      | AGACCTGCTGACAAGGCACTTC    | TGTTCTCCAAAGGCCAAGTA     | AGGAGCTACAAAACCTACCCT              |
| PTGER3      | TCTGCTGGTCTCCGCTACTGATA   | TTCTGCTCCCTGTATGTGTCTTG  | TCAGACATCAGTTGAGCACT               |
| HPGD        | AACTGGGAAAAAAGCTCTGCAAATC | CACCTCCATTTTGCTTACTCATGT | TCTGTTATCAGTGGAACCTA               |
